# Supplementary material for: Substituent effect on the thermophysical properties and thermal dissociation behaviour of 9-substituted anthracene derivatives
Source: Royal Society of Chemistry journal article supplement (doi:10.1039/d0cp05953f), 2021-01-01
Supplement: d0cp05953f1.pdf [file d0cp05953f1.pdf]

# Substituent effect on the thermophysical properties and thermal dissociation behaviour of 9-substituted anthracene derivatives

## Supplementary information

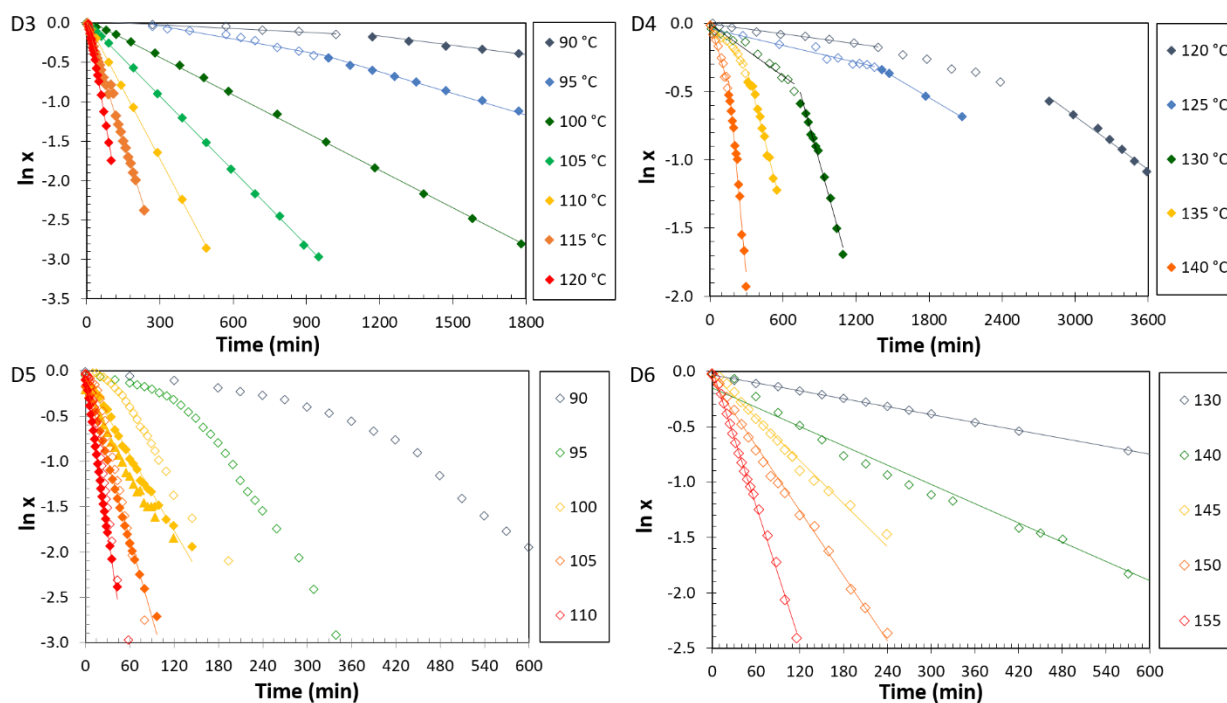

Figure S11 Natural logarithms of the conversions obtained by FTIR during isothermal dissociation of anthracene photodimers (a) D3, (b) D4, (c) D5 and (d) D6 at different temperatures. Solid markers designate the thermal dissociation from the molten state, while open markers designate thermal dissociation from the crystalline state. In the latter case, for D3 and D4 sharp transitions can be seen in the thermal dissociation kinetics, corresponding to a phase transition from predominantly crystalline to molten, amorphous due to melting temperature depression of the dissociating photodimers.
